# Supplementary material for: The Impact of Post-contrast Acute Kidney Injury on In-hospital Mortality After Endovascular Thrombectomy in Patients With Acute Ischemic Stroke
Source: Frontiers journal article supplement (doi:10.3389/fneur.2021.665614), 2021-06-07
Supplement: Table_3.pdf [file Table_3.pdf]

|                                                                                | <b>All PC-AKI patients (N=29)</b> | <b>PC-AKI patients surviving the acute hospital stay (N=22)</b> |
|--------------------------------------------------------------------------------|-----------------------------------|-----------------------------------------------------------------|
| Pneumonia/sepsis, N (%)                                                        | 10 (35)                           | 8 (36)                                                          |
| Acute or decompensated chronic heart failure, N (%)                            | 6 (11)                            | 4 (18)                                                          |
| Acute urinary tract infection, N (%)                                           | 1 (3)                             | 1 (5)                                                           |
| Acute hypertensive crisis, N (%)                                               | 1 (3)                             | 1 (5)                                                           |
| Ongoing chemotherapy with vinorelbine (for alveolar cellular carcinoma), N (%) | 1 (3)                             | 1 (5)                                                           |
| Cardiopulmonary reanimation, catecholamine therapy, N (%)                      | 1 (3)                             | -                                                               |
| No identifiable competing trigger for PC-AKI, N (%)                            | 9 (31)                            | 7 (32)                                                          |

**Supplementary Table 3: Clinical complications and circumstances that may represent a risk for post-contrast acute kidney injury beyond the possibility of a causal relationship with contrast dye**

PC-AKI, post-contrast acute kidney injury.
